# Supplementary material
Source: PubMed Central journal article supplement (PMC8364328)
Supplement: NIHMS1703639-supplement-Supplemental_Publication_Material.pdf [file NIHMS1703639-supplement-Supplemental_Publication_Material.pdf]

## Supplemental Material

### Association of apparent treatment-resistant hypertension with differential risk of end-stage kidney disease across racial groups in the Million Veteran Program

Elvis A. Akwo, MD, PhD<sup>1,2,3\*</sup>; Cassianne Robinson-Cohen, PhD<sup>1,2,3\*</sup>; Cecilia P. Chung, MD, MPH<sup>3,4,5\*</sup>; Shailja C. Shah, MD, MPH<sup>3,6\*</sup>; Nancy J. Brown, MD<sup>7,9</sup>; T. Alp Ikizler, MD<sup>1,2,3</sup>; Otis D. Wilson, BBA<sup>1,3</sup>; Bryce X. Rowan, MHS<sup>8</sup>; Megan M. Shuey<sup>9</sup>, PhD; Edward D. Siew, MD, MSCI<sup>1,2,3</sup>; James M. Luther, MD, MSCI<sup>7</sup>; Ayush Giri, PhD<sup>5</sup>; Jacklyn N. Hellwege<sup>9</sup>, PhD; Digna R. Velez Edwards, PhD<sup>10,11,12</sup>; Christianne L. Roumie, MD, MPH<sup>7,13</sup>; Ran Tao, PhD<sup>5,8</sup>; Phil S. Tsao, PhD<sup>14,15,16</sup>; J. Michael Gaziano, MD, MPH<sup>17,18</sup>; Peter W.F. Wilson, MD<sup>19,20</sup>; Christopher J. O'Donnell, MD, MPH<sup>18,21</sup>; Todd L. Edwards, PhD<sup>5,12,22</sup>; Csaba P. Kovesdy, MD<sup>†23,24</sup>; and Adriana M. Hung, MD, MPH<sup>†Δ1,2,3,25</sup> on behalf of the VA Million Veteran Program

<sup>1</sup>Division of Nephrology and Hypertension, Department of Medicine, Vanderbilt University Medical Center, Nashville, TN. <sup>2</sup>Vanderbilt Center for Kidney Disease. <sup>3</sup>Tennessee Valley Healthcare System, Nashville VA. <sup>4</sup>Division of Rheumatology, Department of Medicine Vanderbilt University Medical Center, Nashville, TN. <sup>5</sup>Vanderbilt Genetics Institute. <sup>6</sup>Division of Gastroenterology, Hepatology and Nutrition, Vanderbilt University Medical Center, Nashville, TN. <sup>7</sup>Department of Medicine, Vanderbilt University Medical Center, Nashville, TN. <sup>8</sup>Yale School of Medicine, New Haven, CT. <sup>9</sup>Division of Genetic Medicine, Department of Medicine, Vanderbilt University Medical Center, Nashville, TN. <sup>10</sup>Division of Quantitative Sciences, Department of Obstetrics and Gynecology, Vanderbilt University Medical Center, Nashville, TN. <sup>11</sup>Department of Biomedical Informatics, Vanderbilt University Medical Center, Nashville, TN. <sup>12</sup>Institute of Medicine and Public Health, Vanderbilt University Medical Center. <sup>13</sup>Veteran Administration Tennessee Valley VA Health Care System Geriatric Research Education Clinical Center (GRECC), Nashville, TN. <sup>14</sup>VA Palo Alto Health Care System. <sup>15</sup>Department of Medicine, Stanford University School of Medicine, Stanford, CA. <sup>16</sup>Stanford Cardiovascular Institute. <sup>17</sup>VA Boston Healthcare System, Boston, MA. <sup>18</sup>Department of Medicine, Brigham and Women's Hospital, Harvard Medical School, Boston, MA. <sup>19</sup>Epidemiology and Genomic Medicine, Atlanta VAMC, Decatur, GA. <sup>20</sup>Cardiology Division, Emory School of Medicine, Atlanta, GA. <sup>21</sup>VA Boston Healthcare System, Section of Cardiology. <sup>22</sup>Division of Epidemiology, Department of Medicine, Vanderbilt University Medical Center, Nashville, TN. <sup>23</sup>Memphis VA Medical Center, TN. <sup>24</sup>University of Tennessee Health Science Center, Memphis, TN. <sup>25</sup>Vanderbilt Precision Nephrology Program, Vanderbilt University Medical Center, Nashville, TN.

\* Co-first authors.

† Co-senior authors.

Correspondence should be addressed to:

Adriana M. Hung, M.D., MPH  
Division of Nephrology & Hypertension  
Vanderbilt University Medical Center  
Nashville, TN 37232-2372  
1161 21st Ave South | MCN S-3223  
Phone 615-343-2220 | Fax 615-343-7156  
Email: [adriana.hung@vumc.org](mailto:adriana.hung@vumc.org)

## **I. Methods**

### **II. Tables (12)**

1. Table S1. List of interfering medications and diagnostic codes used to exclude secondary causes of hypertension at the time of ATRH ascertainment.
2. Table S2. Diagnostic and procedure codes used to identify comorbidities, exposures and outcomes.
3. Table S3. Baseline characteristics of White and African-American hypertensive veterans in the MVP followed up at the Veteran Health Administration from 2004 to 2015.
4. Table S4. Clinical characteristics of veterans with hypertension in the MVP at the time they developed apparent treatment-resistant hypertension during follow-up from 2004 to 2015.
5. Table S5. Association of ATRH with incident ESKD and cardiovascular outcomes among hypertensive veterans in the MVP.
6. Table S6. Cumulative incidence of ATRH-related outcomes and potential population health impact.
7. Table S7. Race-stratified estimates of attributable risk of ESKD due to ATRH.
8. Table S8. Effect of ATRH on incident ESKD and cardiovascular outcomes in a fully adjusted model including time-varying blood pressure, hypertension duration or proteinuria.
9. Table S9. Effect of ATRH on the risk of ESKD and cardiovascular outcomes in the Million Veteran Program: Cox proportional hazard models versus competing-risks analysis.
10. Table S10. Additive interaction between ATRH and both race and GFR for the association with incident MI among Veterans in the Million Veteran Program.
11. Table S11. Additive interaction between ATRH and both race and GFR for the association with incident stroke among Veterans in the Million Veteran Program.
12. Table S12. Prevalence of 0, 1 and 2 *APOL1* risk allele carriers among patients with ATRH and NRH in the Million Veteran Program.

### **III. Figures (4)**

1. Figure S1. Flow chart for retrospective cohort study of 139,685 hypertensive veterans enrolled in the Million Veteran Program who were active VHA users between 01/01/2004 and 12/31/2015.
2. Figure S2. Probability of incident ESKD in patients with ATRH and NRH by race.
3. Figure S3. Adjusted Incidence rate ratios for ESKD and indices of interaction
4. Figure S4: Proportion of patients with ATRH taking 3 or more antihypertensive drugs during the 5 years following ATRH ascertainment.

### **IV. Appendix: VA Million Veteran Program Core Acknowledgements.**

## Methods

### Multi-stage Algorithm for ascertaining apparent treatment resistant hypertension

Starting with the premise that patients primarily refilled their medication on a 90 to 180-day basis, we scanned the entire 12 years (01/01/04 – 12/31/2015) of follow-up in consecutive blocks of 3, then 6 months, in a longitudinal fashion, to ascertain medication refills (for each patient) from pharmacy data in a given time interval. We documented the number of antihypertensive drugs a patient was refilling at any given interval during the study based on the refill dates of all the drugs in the patient's regimen. For example, once a patient was identified as intensifying their antihypertensive regimen with a 4<sup>th</sup> drug, regardless of blood pressure (BP), a refill for all 4 drugs was required to be documented in the next 3 to 6-month refill window to ascertain ATRH. This choice was made to prevent capturing someone who was switching drugs rather than intensifying their regimen. Next, medication use among patients taking three drugs was examined. The date of the 3<sup>rd</sup> drug was ascertained was noted and the maximum BP within 15-180 days thereafter were examined, with patients with maximum BP greater than 140/90 mmHg considered to have ATRH.

Antihypertensive medication classes were defined using the Seventh Report of the Joint National Committee on Prevention, Detection, Evaluation, and Treatment of High Blood Pressure.<sup>1</sup> One-pill combinations were classified into multiple medication classes. Participants (n = 5360) who met the criteria for ATRH prior to cohort entry (first creatinine in the EHR) or who had been diagnosed with secondary causes of HTN were excluded leaving a total of 17,521 patients with incident ATRH. Individuals with non-resistant hypertension (NRH) were defined as patients taking 1 or 2 classes of antihypertensive medications regardless of BP values and patients that were controlled on 3 antihypertensive medications.

### Race/ethnicity

Information on race (White, African-American, Asian, Hawaiian/Pacific Islander and Native American) and ethnicity (Hispanic/Latino) were based on a combination of self-report through centralized VA data collection methods (using standardized survey forms), or through the use of information from the CDW, or Observational Medical Outcomes Partnership (OMOP) data, in case of missing self-report data. Ethnicity and race categories were merged to form the following: non-Hispanic white, non-Hispanic black (African-Americans/black), non-Hispanic Asian (Asian), non-Hispanic Native American and Hispanic.

### Measures of additive interaction

These include the relative excess risk due to interaction (RERI) or interaction contrast ratio (ICR), the attributable proportion due to interaction (AP) and the synergy index (S).<sup>2,3</sup> The RERI or ICR was calculated as:

$$RR_{11} - RR_{10} - RR_{01} + 1 \text{ [equation 1]}$$

In equation 1,  $RR_{11}$  is the rate ratio for the “doubly exposed” group (for example: African-Americans with ATRH) compared to the doubly unexposed group (Whites with NRH).  $RR_{10}$  and  $RR_{01}$  are the rate ratios for each “exposure” or predictor separately in the absence of the other (namely African-Americans with NRH and Whites with ATRH) when compared to the doubly unexposed group (Whites with NRH). The AP is calculated as:  $RERI/RR_{11}$ ; and  $S = RR_{11} - 1/(RR_{10} - 1) + (RR_{01} - 1)$ . A p-value <0.05 for the null hypothesis of  $RERI = 0$  (equivalent to testing for  $AP = 0$  and  $S = 1$ ) was considered significant for additive interaction. This would indicate that the rate of ESKD attributable to the combination of 2 exposures (having ATRH and being of African-American race) was greater than the sum of the of the rate of disease that would be caused by each exposure (ATRH and African-American race) separately.

### Modeling continuous covariates in multivariable models

All continuous covariates were modeled using restricted cubic splines with 4 knots. Knots were placed at quantiles of the covariate's distribution, equally spaced in sample size.<sup>4</sup>

### Multiple imputation of missing data

The proportion of missing values was computed for each covariate and the missingness patterns were examined using hierarchical cluster analysis of variables usually missing together.<sup>4</sup> Serum lipids had the highest proportion of missing values (15%). The proportion of missing values for BMI, smoking, baseline systolic BP and diastolic BP in our MVP cohort was 10, 1.1, 0.1, and 0.1% respectively. Multiple imputation of the missing values was performed using the *aregImpute* algorithm in the Hmisc package in R. Details of the *aregImpute* algorithm have been described elsewhere.<sup>4</sup> Briefly, the algorithm accounts for all aspects of uncertainty in the imputations by using bootstrap resamples to approximate the process of drawing predicted values from a full Bayesian predictive distribution. Different bootstrap resamples are used for each of the multiple imputations that are performed by the algorithm. A flexible additive model is fit on a sample with replacement from the original data and this model is used to predict all of the original missing as well as the non-missing values for the target variable, then the imputation models are run. In the imputation model, linearity is assumed for the variables being imputed while continuous predictors on the right-hand side of the model are transformed using restricted cubic splines with 5 knots. The algorithm uses predictive mean matching with weighted probability sampling of donors to fill-in the missing data.<sup>4</sup> Five imputations were performed, creating 5 complete data sets. The final multivariable Cox model (containing all covariates included in the imputation model) was fitted on each complete data set, and the regression coefficients were averaged over the multiple imputations.

## Supplemental References

1. Chobanian AV, Bakris GL, Black HR, Cushman WC, Green LA, Izzo JL, Jr., Jones DW, Materson BJ, Oparil S, Wright JT, Jr. and Roccella EJ. Seventh report of the Joint National Committee on Prevention, Detection, Evaluation, and Treatment of High Blood Pressure. *Hypertension*. 2003;42:1206-52.
2. Li R and Chambless L. Test for additive interaction in proportional hazards models. *Annals of epidemiology*. 2007;17:227-36.
3. Rothman KJ, Greenland S and Walker AM. Concepts of interaction. *American Journal of Epidemiology*. 1980;112:467-70.
4. Harrell FE, Jr. *Regression Modelling Strategies with Applications to Linear Models, Logistic and Ordinal Regression, and Survival Analysis*. Second ed. New York: Springer; 2015.

**Table S1. List of interfering medications and diagnostic codes used to exclude secondary causes of hypertension at the time of ATRH ascertainment**

| ICD-9 Code                                                                            | Clinical conditions                                                                                                                                                                                                                                                                                                                                                                                                                                                          |
|---------------------------------------------------------------------------------------|------------------------------------------------------------------------------------------------------------------------------------------------------------------------------------------------------------------------------------------------------------------------------------------------------------------------------------------------------------------------------------------------------------------------------------------------------------------------------|
| 252<br>252<br>252.01<br>252.02<br>252.08<br>252.1<br>252.8<br>252.9                   | <b>Parathyroid disease</b><br>Hyperparathyroidism<br>Hyperparathyroidism, unspecified<br>Primary hyperparathyroidism<br>Secondary hyperparathyroidism, non-renal<br>Other hyperparathyroidism<br>Hypoparathyroidism<br>Other specified disorders of parathyroid gland<br>Unspecified disorder of parathyroid gland                                                                                                                                                           |
| 327.2<br>327.21<br>327.22<br>327.23<br>327.24<br>327.25<br>327.26<br>327.27<br>327.29 | <b>Sleep apnea</b><br>Organic sleep apnea, unspecified<br>Primary central sleep apnea<br>High altitude periodic breathing<br>Obstructive sleep apnea (adult) (pediatric)<br>Idiopathic sleep related non-obstructive alveolar hypoventilation<br>Congenital central alveolar hypoventilation syndrome<br>Sleep related hypoventilation/hypoxemia in conditions classifiable elsewhere<br>Central sleep apnea in conditions classified elsewhere<br>Other organic sleep apnea |
| 405.01<br>405.09<br>405.11<br>405.19<br>405.91<br>405.99                              | <b>Secondary hypertension</b><br>Malignant renovascular hypertension<br>Other malignant secondary hypertension<br>Benign renovascular hypertension<br>Other benign secondary hypertension<br>Unspecified renovascular hypertension<br>Other unspecified secondary hypertension                                                                                                                                                                                               |
| 227.0<br>255.0<br>255.1<br>255.3<br>255.6                                             | <b>Cortico-adrenal disorders</b><br>Benign neoplasm of adrenal gland<br>Cushing's Syndrome<br>Hyperaldosteronism<br>Other corticoadrenal overactivity<br>Medulloadrenal hyperfunction                                                                                                                                                                                                                                                                                        |
| 599.60<br>599.69                                                                      | <b>Urinary obstruction</b><br>Urinary obstruction, unspecified<br>Urinary obstruction, not elsewhere classified                                                                                                                                                                                                                                                                                                                                                              |
| 240<br>240.9<br>241<br>241.1<br>241.9                                                 | <b>Thyroid disorders</b><br>Goiter, specified as simple<br>Goiter, unspecified<br>Nontoxic multinodular goiter<br>Nontoxic multinodular goiter<br>Unspecified nontoxic nodular goiter                                                                                                                                                                                                                                                                                        |

| ICD-9 code | Clinical Conditions                                                                                        |
|------------|------------------------------------------------------------------------------------------------------------|
| 242        | Toxic diffuse goiter without mention of thyrotoxic crisis or storm                                         |
| 242.01     | Toxic diffuse goiter with mention of thyrotoxic crisis or storm                                            |
| 242.1      | Toxic 7nimodular goiter without mention of thyrotoxic crisis or storm                                      |
| 242.11     | Toxic 7nimodular goiter with mention of thyrotoxic crisis or storm                                         |
| 242.2      | Toxic multinodular goiter without mention of thyrotoxic crisis or storm                                    |
| 242.21     | Toxic multinodular goiter with mention of thyrotoxic crisis or storm                                       |
| 242.3      | Toxic nodular goiter, unspecified type, without mention of thyrotoxic crisis or storm                      |
| 242.31     | Toxic nodular goiter, unspecified type, with mention of thyrotoxic crisis or storm                         |
| 242.4      | Thyrotoxicosis from ectopic thyroid nodule without mention of thyrotoxic crisis or storm                   |
| 242.41     | Thyrotoxicosis from ectopic thyroid nodule with mention of thyrotoxic crisis or storm                      |
| 242.8      | Thyrotoxicosis of other specified origin without mention of thyrotoxic crisis or storm                     |
| 242.81     | Thyrotoxicosis of other specified origin with mention of thyrotoxic crisis or storm                        |
| 242.9      | Thyrotoxicosis without mention of goiter or other cause, and without mention of thyrotoxic crisis or storm |
| 242.91     | Thyrotoxicosis without mention of goiter or other cause, with mention of thyrotoxic crisis or storm        |
| 243        | Congenital hypothyroidism                                                                                  |
| 244        | Postsurgical hypothyroidism                                                                                |
| 244.1      | Other postablative hypothyroidism                                                                          |
| 244.2      | Iodine hypothyroidism                                                                                      |
| 244.3      | Other iatrogenic hypothyroidism                                                                            |
| 244.8      | Other specified acquired hypothyroidism                                                                    |
| 244.9      | Unspecified acquired hypothyroidism                                                                        |
| 245        | Acute thyroiditis                                                                                          |
| 245.1      | Subacute thyroiditis                                                                                       |
| 245.2      | Chronic lymphocytic thyroiditis                                                                            |
| 245.3      | Chronic fibrous thyroiditis                                                                                |
| 245.4      | Iatrogenic thyroiditis                                                                                     |
| 245.8      | Other and unspecified chronic thyroiditis                                                                  |
| 245.9      | Thyroiditis, unspecified                                                                                   |
| 246        | Disorders of thyrocalcitonin secretion                                                                     |
| 246.1      | Dyshormonogenic goiter                                                                                     |
| 246.2      | Cyst of thyroid                                                                                            |
| 246.3      | Hemorrhage and infarction of thyroid                                                                       |
| 246.8      | Other specified disorders of thyroid                                                                       |
| 246.9      | Unspecified disorder of thyroid                                                                            |
|            | <b>Interfering medications that motivated exclusions in the ATRH arm</b>                                   |
| 1.         | Erythropoiesis-stimulating agents (Epoetin and Dabepoetin)                                                 |
| 2.         | Calcineurin inhibitors (Cyclosporine and Tacrolimus).                                                      |
| 3.         | Corticosteroids (Prednisone, Prednisolone, Methylprednisolone and Dexamethasone).                          |
| 4.         | Amphetamines (Amphetamine, Dextroamphetamine and Methylphenidate).                                         |

**Abbreviations:** ATRH, apparent treatment-resistant hypertension; BP, blood pressure.

**Table S2: Diagnostic and procedure codes used to identify comorbidities, exposures and outcomes**

|                                       | <b>Definition</b>                                                                                                                                                                                                                                                        |
|---------------------------------------|--------------------------------------------------------------------------------------------------------------------------------------------------------------------------------------------------------------------------------------------------------------------------|
| <b>Past Medical History</b>           |                                                                                                                                                                                                                                                                          |
| Diabetes Mellitus                     | ICD-9 codes : 249.x, 250.x, 357.2x, 362.0x, 366.41 ; ICD-9 CM codes V45.85, V53.91                                                                                                                                                                                       |
| Hypertension                          | ICD-9 codes: 401.x-405.x, 437.2                                                                                                                                                                                                                                          |
| Coronary Artery Disease               | ICD-9 codes : 410.x-413.x, 414.0x, 414.2-414.9, V45.81, V45.82                                                                                                                                                                                                           |
| Stroke                                | ICD9-CM diagnosis codes: ischemic stroke (433.x1, 434 [excluding 434.x0], or 436), intracerebral hemorrhage (431), and subarachnoid hemorrhage (430) but excluded traumatic brain injury (800–804, and 850–854).                                                         |
| Chronic Obstructive Pulmonary Disease | ICD9-CM diagnosis codes : 491.x-492.x, 493.2x, 496.x                                                                                                                                                                                                                     |
| Malignancy                            | Cancer excluding non-melanoma skin cancer: ICD9-CM codes: 140.x-208.x (excluding 173.x)                                                                                                                                                                                  |
| Peripheral Vascular Disease           | ICD-9 codes : 440.x, 441.x, 442.x, 444.2x, V43.4                                                                                                                                                                                                                         |
| <b>Inpatient Diagnoses</b>            |                                                                                                                                                                                                                                                                          |
| Acute Myocardial Infarction           | ICD-9 codes: 410.x                                                                                                                                                                                                                                                       |
| Dialysis                              | Dialysis ICD-9 procedure codes : 39.93, 39.95, 54.98, V39.27, V39.42, V38.43, V45.1, V56.0, V56.2, V56.31, V56.32, V56.8<br>ICD-9 Diagnosis codes : 585.6<br>CPT codes: 90921, 90925, 90935, 90937, 90945, 90947, 90960, 90961, 90962, 90966, 90989, 90993, 90999, G8956 |
| Renal transplant                      | ICD-9 codes : 55.69, 996.81, V42.0<br>ICD-9 inpatient procedure codes : 00.91, 00.92, 00.93<br>outpatient CPT codes: 50360, 50365                                                                                                                                        |
| Hospice care                          | ICD-9 outpatient or inpatient discharge codes : V66.7<br>CPT code: 99377                                                                                                                                                                                                 |



**Table S3. Baseline characteristics of White and African-American hypertensive veterans in the MVP followed up at the Veteran Health Administration from 2004 to 2015**

| Baseline characteristics           | Whites<br>n = 98, 580 | African-Americans<br>n = 30, 950 |
|------------------------------------|-----------------------|----------------------------------|
| Age, years                         | 62 (56-69)            | 55 (50-61)                       |
| Women, %                           | 4.1                   | 97.9                             |
| Body Mass Index, kg/m <sup>2</sup> | 30.3 (27.1-34.2)      | 30.1 (26.7-34.1)                 |
| Systolic BP, mmHg                  | 136 (125-147)         | 138 (127-150)                    |
| Diastolic BP, mmHg                 | 78 (70-86)            | 82 (75-91)                       |
| eGFR, mL/min/1.73m <sup>2</sup>    | 76.8 (63.9-90.5)      | 85.7 (71.7-100.8)                |
| Serum Lipids, mg/dl                |                       |                                  |
| Total Cholesterol                  | 180 (156-208)         | 185 (160-213)                    |
| HDL Cholesterol                    | 41 (34-49)            | 44 (37-54)                       |
| LDL Cholesterol                    | 105 (85-129)          | 112 (89-136)                     |
| Triglycerides                      | 146 (100-216)         | 112 (79-168)                     |
| Smoking history, %                 |                       |                                  |
| Never                              | 24.1                  | 23.4                             |
| Former                             | 54.7                  | 43.0                             |
| Current                            | 21.2                  | 33.6                             |
| Comorbidities, %                   |                       |                                  |
| Diabetes                           | 28.3                  | 30.0                             |
| Cerebrovascular disease            | 3.2                   | 4.0                              |
| Coronary artery disease            | 31.6                  | 19.4                             |
| Peripheral artery disease          | 6.3                   | 4.7                              |
| COPD                               | 12.9                  | 9.2                              |
| All malignancies                   | 10.1                  | 8.4                              |
| Anti-hypertensive drugs, %         |                       |                                  |
| ACE-Inhibitors/ARBs                | 63.4                  | 58.1                             |
| Beta Blockers                      | 41.0                  | 29.7                             |
| Alpha Blockers                     | 15.9                  | 12.5                             |
| Calcium Channel Blockers           | 25.0                  | 37.6                             |
| Thiazide diuretics                 | 30.0                  | 44.6                             |
| Loop diuretics                     | 7.7                   | 6.8                              |
| Potassium-sparing diuretics        | 6.4                   | 8.6                              |
| Vasodilators                       | 0.5                   | 1.5                              |

<sup>a</sup>All between-group comparisons were statistically significant ( $P < 0.001$  for all other baseline variables).

<sup>b</sup>**Abbreviations:** ACE indicates angiotensin converting enzyme; ARB, angiotensin II receptor blocker; BP, blood pressure; COPD, chronic obstructive pulmonary disease; eGFR, estimated glomerular filtration rate.

**Table S4. Clinical characteristics of veterans with hypertension in the MVP at the time they developed apparent treatment-resistant hypertension during follow-up from 2004 to 2015**

| Baseline characteristics                      | Apparent Treatment-Resistant HTN<br>n = 17,521 |
|-----------------------------------------------|------------------------------------------------|
| Body Mass Index (IQR), kg/m <sup>2</sup>      | 31.4 (27.8-35.6)                               |
| Systolic BP (IQR), mm Hg                      | 144 (131-154)                                  |
| Diastolic BP (IQR), mm Hg                     | 79 (70-88)                                     |
| eGFR (IQR), mL/min/1.73m <sup>2</sup>         | 74.4 (59.8-89.9)                               |
| Current Smoking, %                            | 18.4                                           |
| Comorbidities, %                              |                                                |
| Diabetes                                      | 51.1                                           |
| Cerebrovascular disease                       | 2.1                                            |
| Coronary artery disease                       | 26.3                                           |
| Peripheral artery disease                     | 6.7                                            |
| COPD                                          | 13.2                                           |
| All malignancies                              | 2.5                                            |
| Anti-hypertensive drugs, %                    |                                                |
| ACE-Inhibitors/ARBs                           | 88.7                                           |
| Beta Blockers                                 | 67.8                                           |
| Alpha Blockers                                | 32.4                                           |
| Calcium Channel Blockers                      | 59.4                                           |
| Thiazide diuretics                            | 100.0                                          |
| Loop diuretics                                | 10.6                                           |
| Potassium-sparing diuretics                   | 5.1                                            |
| Vasodilators                                  | 3.2                                            |
| Number of antihypertensive drug classes (IQR) | 4 (3-4)                                        |

**Abbreviations:** ACE indicates angiotensin converting enzyme; ARB, angiotensin II receptor blocker; BP, blood pressure; COPD, chronic obstructive pulmonary disease; eGFR, estimated glomerular filtration rate; HTN, Hypertension.

**Table S5: Association of ATRH with incident ESKD and cardiovascular outcomes among hypertensive veterans in the MVP.**

|                                 | Non-Resistant HTN | Apparent Treatment resistant HTN |
|---------------------------------|-------------------|----------------------------------|
| <b>Primary outcome:</b>         |                   |                                  |
| <i>Incident ESKD cases</i>      | 2138              | 613                              |
| Person-Years (PY)               | 1, 343, 334       | 131, 210                         |
| Incidence rate/1000PY (95 % CI) | 1.59 (1.52-1.66)  | 4.68 (4.34-5.07)                 |
| Hazard ratios (95% CI)          |                   |                                  |
| Model 1                         | 1.00 (ref)        | 2.22 (2.02-2.43)                 |
| Model 2                         | 1.00 (ref)        | 2.07 (1.89-2.27)                 |
| Model 3                         | 1.00 (ref)        | 1.85 (1.67-2.04)                 |
| <b>Secondary Outcomes:</b>      |                   |                                  |
| <i>Incident MI cases</i>        | 4517              | 872                              |
| Person-Years (PY)               | 1, 330, 911       | 129, 376                         |
| Incidence rate/1000PY (95 % CI) | 3.39 (3.29-3.49)  | 6.74 (6.30-7.20)                 |
| Hazard ratios (95% CI)          |                   |                                  |
| Model 1                         | 1.00 (ref)        | 1.72 (1.60-1.85)                 |
| Model 2                         | 1.00 (ref)        | 1.70 (1.58-1.83)                 |
| Model 3                         | 1.00 (ref)        | 1.65 (1.52-1.78)                 |
| <i>Incident cases of Stroke</i> | 10, 918           | 2033                             |
| Person-Years (PY)               | 1, 290, 739       | 121, 890                         |
| Incidence rate/1000PY (95 % CI) | 8.46 (8.3-8.62)   | 16.68 (15.97-17.42)              |
| Hazard ratios (95% CI)          |                   |                                  |
| Model 1                         | 1.00 (ref)        | 1.89 (1.80-1.98)                 |
| Model 2                         | 1.00 (ref)        | 1.87 (1.78-1.96)                 |
| Model 3                         | 1.00 (ref)        | 1.81 (1.72-1.91)                 |

**Model 1:** Includes ATRH (modeled as a time-varying covariate versus non-resistant HTN), age (restricted cubic splines with 4 knots), race (Whites/Blacks/Other) and sex (M/F). **Model 2:** Model 1 + baseline eGFR (restricted cubic splines with 4 knots) and calendar year of cohort entry (4 categories of 3 consecutive years). **Model 3:** Model 2 + smoking (never, former, current) + BMI (restricted cubic splines with 4 knots) + serum lipids (total cholesterol, triglycerides, LDL cholesterol and HDL cholesterol; all restricted cubic splines with 4 knots) + statin use + history of Cancer, COPD, diabetes, CAD, PAD and stroke (all yes/no). Abbreviations: ATRH, apparent treatment resistant hypertension; BMI, body mass index; CAD, coronary artery disease; COPD, chronic obstructive pulmonary disease; eGFR, estimated glomerular filtration rate; PAD, peripheral artery disease.

**Abbreviations:** ATRH, apparent treatment resistant hypertension; BMI, body mass index; CAD, coronary artery disease; COPD, chronic obstructive pulmonary disease; DBP, diastolic blood pressure; eGFR, estimated glomerular filtration rate; HTN, hypertension; PAD, peripheral artery disease; SBP, systolic blood pressure.

**Table S6: Cumulative incidence of ATRH-related outcomes and potential population health impact**

|                                     | <b>Non-Resistant HTN</b> | <b>Apparent Treatment resistant HTN</b> |
|-------------------------------------|--------------------------|-----------------------------------------|
| <b>Incident ESKD</b>                |                          |                                         |
| Cumulative incidence, %             | 2.17                     | 5.31                                    |
| Attributable fraction, %            | ref.                     | 57.2                                    |
| Population attributable fraction, % | ref.                     | 12.8                                    |
| Number Needed to Harm               | ref.                     | 32                                      |
| <b>Incident MI</b>                  |                          |                                         |
| Cumulative Incidence, %             | 4.37                     | 8.42                                    |
| Attributable fraction, %            | ref.                     | 42.3                                    |
| Population attributable fraction, % | ref.                     | 6.8                                     |
| Number Needed to Harm               | ref.                     | 25                                      |
| <b>Incident Stroke</b>              |                          |                                         |
| Cumulative Incidence, %             | 10.06                    | 22.48                                   |
| Attributable fraction, %            | ref.                     | 48.4                                    |
| Population attributable fraction, % | ref.                     | 7.6                                     |
| Number Needed to Harm               | ref.                     | 8                                       |

**Abbreviations:** ATRH, apparent treatment-resistant hypertension; ESKD, end-stage kidney disease; HTN, Hypertension; MI, myocardial infarction.

**Table S7: Race-stratified estimates of attributable risk of ESKD due to ATRH**

|                                        | <b>Non-Resistant HTN</b> | <b>Apparent Treatment resistant HTN</b> |
|----------------------------------------|--------------------------|-----------------------------------------|
| <b>Whites</b>                          |                          |                                         |
| Cumulative Incidence, %                | 1.60                     | 4.15                                    |
| Attributable risk, per 1000            | ref.                     | 25.5                                    |
| Population attributable risk, per 1000 | ref.                     | 2.6                                     |
| Number needed to harm                  | ref.                     | 39                                      |
| <b>African-Americans</b>               |                          |                                         |
| Cumulative Incidence, %                | 4.05                     | 8.49                                    |
| Attributable risk, per 1000            | ref.                     | 44.4                                    |
| Population attributable risk, per 1000 | ref.                     | 5.4                                     |
| Number needed to harm                  | ref.                     | 23                                      |

**Abbreviations:** ATRH, apparent treatment-resistant hypertension; ESKD, end-stage kidney disease; HTN, Hypertension.

**Table S8. Effect of ATRH on incident ESKD and cardiovascular outcomes in a fully adjusted model<sup>a</sup> including time-varying<sup>b</sup> blood pressure, hypertension duration<sup>c</sup> or proteinuria<sup>d</sup>**

| <b>Outcome</b>  | <b>SBP and DBP</b> | <b>HTN duration</b> | <b>Proteinuria</b> |
|-----------------|--------------------|---------------------|--------------------|
| Incident ESKD   | 1.63 (1.48-1.80)   | 1.84 (1.67-2.04)    | 1.62 (1.44, 1.82)  |
| Incident MI     | 1.60 (1.48-1.74)   | 1.64 (1.51, 1.78)   | 1.64 (1.49, 1.80)  |
| Incident Stroke | 1.77 (1.68-1.86)   | 1.80 (1.71-1.90)    | 1.76 (1.65, 1.87)  |

<sup>a</sup> Covariates included age (restricted cubic splines with 4 knots), race (Whites/Blacks/Other), sex (M/F), baseline eGFR (restricted cubic splines with 4 knots), calendar year of cohort entry (4 categories of 3 consecutive years), smoking (never, former, current), BMI (restricted cubic splines with 4 knots), serum lipids (total cholesterol, triglycerides, LDL cholesterol and HDL cholesterol; all restricted cubic splines with 4 knots), statin use, history of Cancer, COPD, diabetes, CAD, PAD and stroke (all yes/no).

<sup>b</sup> Time-varying blood pressure: Baseline BP values were updated at time of ATRH for persons who developed incident ATRH.

<sup>c</sup> HTN duration: Time (in years) from the date of the first HTN code in the medical record to the date of cohort entry.

<sup>d</sup> This analysis was conducted in the 65% of participants with available urine protein data at cohort entry.

**Abbreviations:** ATRH, apparent treatment resistant hypertension; BMI, body mass index; CAD, coronary artery disease; COPD, chronic obstructive pulmonary disease; DBP, diastolic blood pressure; eGFR, estimated glomerular filtration rate; HTN, hypertension; PAD, peripheral artery disease; SBP, systolic blood pressure.

**Table S9. Effect of ATRH on the risk of ESKD and cardiovascular outcomes among veterans in the MVP: Cox models versus competing-risks regression (Fine and Gray model)**

|                                 | <b>Cox PHM</b>   | <b>Fine and Gray Model</b> |
|---------------------------------|------------------|----------------------------|
|                                 | n = 139, 685     | n = 139, 685               |
| <b>Incident ESKD cases</b>      | 2751             | 2751                       |
| Model 1                         | 2.22 (2.02-2.43) | 2.22 (2.03-2.44)           |
| Model 2                         | 2.07 (1.89-2.27) | 2.09 (1.90-2.29)           |
| Model 3                         | 1.85 (1.67-2.04) | 1.86 (1.68-2.05)           |
| <b>Incident MI cases</b>        | 5389             | 5389                       |
| Model 1                         | 1.72 (1.60-1.85) | 1.73 (1.60-1.86)           |
| Model 2                         | 1.70 (1.58-1.83) | 1.71 (1.59-1.84)           |
| Model 3                         | 1.65 (1.52-1.78) | 1.66 (1.52-1.79)           |
| <b>Incident cases of Stroke</b> | 12, 951          | 12, 951                    |
| Model 1                         | 1.89 (1.80-1.98) | 1.89 (1.80-1.99)           |
| Model 2                         | 1.87 (1.78-1.96) | 1.88 (1.79-1.97)           |
| Model 3                         | 1.81 (1.72-1.91) | 1.81 (1.72-1.92)           |

**Model 1:** Includes ATRH (modeled as a time-varying covariate versus non-resistant HTN), age (restricted cubic splines with 4 knots), race (Whites/Blacks/Other) and sex (M/F). **Model 2:** Model 1 + baseline eGFR (restricted cubic splines with 4 knots) and calendar year of cohort entry (4 categories of 3 consecutive years). **Model 3:** Model 2 + smoking (never, former, current) + BMI (restricted cubic splines with 4 knots) + serum lipids (total cholesterol, triglycerides, LDL cholesterol and HDL cholesterol; all restricted cubic splines with 4 knots) + Statin use + history of Cancer, COPD, diabetes, CAD, PAD and stroke (all yes/no).

**Abbreviations:** ATRH, apparent treatment resistant hypertension; BMI, body mass index; CAD, coronary artery disease; COPD, chronic obstructive pulmonary disease; eGFR, estimated glomerular filtration rate; MVP, million veteran program; PAD, peripheral artery disease; PHM, proportional hazards model.

**Table S10. Additive interaction between ATRH and both race and eGFR for the association with incident MI among hypertensive veterans in the Million Veteran Program**

| <b>Interaction with race</b> (p-interaction = 0.41) |                                                   |                                                   |                                              |                                                |
|-----------------------------------------------------|---------------------------------------------------|---------------------------------------------------|----------------------------------------------|------------------------------------------------|
|                                                     | Whites with NRH<br>(n = 86, 891)                  | Whites with ATRH<br>(n = 11, 621)                 | Blacks with NRH<br>(n = 26, 349)             | Blacks with ATRH<br>(4588)                     |
| Incident MI cases                                   | 3360                                              | 616                                               | 835                                          | 201                                            |
| Person-Years (PY)                                   | 946, 998                                          | 85788, 160                                        | 288, 947                                     | 33, 778                                        |
| Incidence rate*/1000PY (95 % CI)                    | 3.49 (3.37-3.61)                                  | 7.04 (6.51-7.63))                                 | 3.00 (2.80-3.21)                             | (6.12 (5.33-7.03)                              |
| Incidence rate ratio* (95% CI)                      | 1.00 (ref)                                        | 2.02 (1.85-2.20)                                  | 0.86 (0.80-0.93)                             | 1.75 (1.52-2.02)                               |
| Hazard ratios (95% CI)                              |                                                   |                                                   |                                              |                                                |
| Model 1                                             | 1.00 (ref)                                        | 1.76 (1.61-1.91)                                  | 0.88 (0.81-0.95)                             | 1.52 (1.32-1.76)                               |
| Model 2                                             | 1.00 (ref)                                        | 1.73 (1.58-1.88)                                  | 0.88 (0.82-0.95)                             | 1.52 (1.31-1.75)                               |
| Model 3                                             | 1.00 (ref)                                        | 1.68 (1.53-1.84)                                  | 0.95 (0.87-1.03)                             | 1.62 (1.39-1.89)                               |
| <b>Interaction with eGFR</b> (p-interaction = 0.13) |                                                   |                                                   |                                              |                                                |
|                                                     | Patients with eGFR ≥ 60 and<br>NRH (n = 102, 450) | Patients with eGFR ≥ 60 and<br>ATRH (n = 14, 507) | Patients with eGFR < 60 and<br>NRH (19, 625) | Patients with eGFR < 60 and<br>ATRH (n = 3014) |
| Incident MI cases                                   | 3534                                              | 661                                               | 983                                          | 211                                            |
| Person-Years (PY)                                   | 1, 115, 145                                       | 105, 336                                          | 215, 766                                     | 24, 040                                        |
| Incidence rate*/1000PY (95 % CI)                    | 3.19 (3.09-3.30)                                  | 6.31 (5.58-6.81)                                  | 4.33 (4.05-4.63)                             | 8.41 (7.34-9.64)                               |
| Incidence rate ratio* (95% CI)                      | 1.00 (ref)                                        | 1.98 (1.82-2.15)                                  | 1.36 (1.26-1.46)                             | 2.63 (2.29-3.03)                               |
| Hazard ratios (95% CI)                              |                                                   |                                                   |                                              |                                                |
| Model 1                                             | 1.00 (ref)                                        | 1.70 (1.57-1.85)                                  | 1.39 (1.29-1.50)                             | 2.38 (2.07-2.74)                               |
| Model 2                                             | 1.00 (ref)                                        | 1.70 (1.56-1.85)                                  | 1.40 (1.30-1.51)                             | 2.40 (2.08-2.76)                               |
| Model 3                                             | 1.00 (ref)                                        | 1.66 (1.52-1.82)                                  | 1.29 (1.29-1.50)                             | 2.04 (1.75-2.39)                               |

**Model 1:** adjusted for age, sex and race (omitted when testing the interaction with race but included for models testing GFR interaction). **Model 2:** adjusted for age, sex, race, calendar year of cohort entry and eGFR (omitted when testing the interaction with GFR but included for models testing interaction with race). **Model 3:** Model 2 + smoking + BMI + serum lipids (total cholesterol, triglycerides, LDL cholesterol and HDL cholesterol;) + Statin use + history of Cancer, COPD, diabetes, CAD, PAD and stroke. Abbreviations: ATRH, apparent treatment resistant hypertension; BMI, body mass index; CAD, coronary artery disease; CKD, chronic kidney disease; COPD, chronic obstructive pulmonary disease; MI, myocardial infarction; MVP, million veteran program; PAD, peripheral artery disease.

\*Incidence rates are age-adjusted (adjusted to the mean age at cohort entry: 60 years).



**Table S11. Additive interaction between ATRH and both race and eGFR for the association with incident stroke among hypertensive veterans in the Million Veteran Program**

| <b>Interaction with race (p-interaction = 0.02)<sup>§</sup></b> |                                                   |                                                   |                                              |                                                |
|-----------------------------------------------------------------|---------------------------------------------------|---------------------------------------------------|----------------------------------------------|------------------------------------------------|
|                                                                 | Whites with NRH<br>(n= 86, 959)                   | Whites with ATRH<br>(n = 11, 621)                 | Blacks with NRH<br>(n = 26, 362)             | Blacks with ATRH<br>(4588)                     |
| Incident cases of stroke                                        | 7514                                              | 1278                                              | 2616                                         | 581                                            |
| Person-Years (PY)                                               | 921, 225                                          | 81, 618                                           | 277, 625                                     | 31, 257                                        |
| Incidence rate*/1000PY (95 % CI)                                | 7.81 (7.63-7.99)                                  | 14.95 (14.15-15.80)                               | 10.15 (9.76-10.55)                           | 19.56 (18.03-21.21)                            |
| Incidence rate ratio* (95% CI)                                  | 1.00 (ref)                                        | 1.91 (1.80-2.03)                                  | 1.30 (1.24-1.36)                             | 2.50 (2.30-2.73)                               |
| <b>Hazard ratios (95% CI)</b>                                   |                                                   |                                                   |                                              |                                                |
| Model 1                                                         | 1.00 (ref)                                        | 1.86 (1.75-1.98)                                  | 1.31 (1.23-1.38)                             | 2.45 (2.25-2.67)                               |
| Model 2                                                         | 1.00 (ref)                                        | 1.84 (1.74-1.96)                                  | 1.30 (1.24-1.36)                             | 2.41 (2.21-2.62)                               |
| Model 3                                                         | 1.00 (ref)                                        | 1.77 (1.66-1.90)                                  | 1.20 (1.14-1.27)                             | 2.18 (1.99-2.39)                               |
| <b>Interaction with eGFR (p-interaction = 0.65)</b>             |                                                   |                                                   |                                              |                                                |
|                                                                 | Patients with eGFR ≥ 60 and<br>NRH (n = 102, 305) | Patients with eGFR ≥ 60 and<br>ATRH (n = 14, 507) | Patients with eGFR < 60 and<br>NRH (19, 574) | Patients with eGFR < 60 and<br>ATRH (n = 3014) |
| Incident cases of stroke                                        | 8591                                              | 1589                                              | 2327                                         | 444                                            |
| Person-Years (PY)                                               | 1, 083, 925                                       | 99, 405                                           | 206, 814                                     | 22, 485                                        |
| Incidence rate*/1000PY (95 % CI)                                | 8.02 (7.85-8.19)                                  | 16.10 (15.33-16.92)                               | 10.26 (9.82-10.72)                           | 18.26 (16.62-20.06)                            |
| Incidence rate ratio* (95% CI)                                  | 1.00 (ref)                                        | 2.01 (1.90-2.12)                                  | 1.28 (1.22-1.34)                             | 2.28 (2.07-2.51)                               |
| <b>Hazard ratios (95% CI)</b>                                   |                                                   |                                                   |                                              |                                                |
| Model 1                                                         | 1.00 (ref)                                        | 1.92 (1.82-2.03)                                  | 1.32 (1.26-1.38)                             | 2.26 (2.05-2.48)                               |
| Model 2                                                         | 1.00 (ref)                                        | 1.92 (1.82-2.03)                                  | 1.33 (1.26-1.39)                             | 2.27 (2.06-2.50)                               |
| Model 3                                                         | 1.00 (ref)                                        | 1.99 (1.79-2.21)                                  | 1.22 (1.15-1.28)                             | 1.99 (1.79-2.21)                               |

**Model 1:** adjusted for age, sex and race (omitted when testing the interaction with race but included for models testing GFR interaction). **Model 2:** adjusted for age, sex, race, calendar year of cohort entry and eGFR (omitted when testing the interaction with GFR but included for models testing interaction with race). **Model 3:** Model 2 + smoking + BMI + serum lipids (total cholesterol, triglycerides, LDL cholesterol and HDL cholesterol) + Statin use + history of Cancer, COPD, diabetes, CAD, PAD and stroke. Abbreviations: ATRH, apparent treatment resistant hypertension; BMI, body mass index; CAD, coronary artery disease; CKD, chronic kidney disease; COPD, chronic obstructive pulmonary disease; PAD, peripheral artery disease.

\*Incidence rates are age-adjusted (adjusted to the mean age at cohort entry: 60 years).

<sup>§</sup>Excess stroke incidence among blacks with ATRH due to interaction between ATRH and race =  $IR_{11} - [IR_{00} + (IR_{01} - IR_{00}) + (IR_{10} - IR_{00})] = 19.56 - [7.81 + (14.95 - 7.81) + (10.15 - 7.81)] = 2.27$  which represents an excess of 227 cases/100,000PY among blacks with ATRH. The relative excess risk due to interaction (RERI) between ATRH and race =  $IRR_{11} - IRR_{10} - IRR_{01} + 1 = 0.29$  (95%CI: 0.05-0.53). The attributable proportion (AP) =  $RERI/IRR_{11} = 11.6$  (3.0, 20.2) suggesting that up to 11.6% of the risk of incident stroke among blacks with ATRH is due to the synergistic interaction between ATRH and race.

**Table S12. Prevalence of 0, 1 and 2 *APOL1* risk allele carriers among patients with ATRH and NRH in the Million Veteran Program.**

| <b>Number of <i>APOL1</i> risk alleles</b> | <b>Overall<br/>n (%)</b> | <b>NRH<br/>n (%)</b> | <b>ATRH<br/>n (%)</b> |
|--------------------------------------------|--------------------------|----------------------|-----------------------|
| 0                                          | 10740 (41.7)             | 9266 (41.2)          | 1474 (42.2)           |
| 1                                          | 11993 (45.9)             | 10390 (46.1)         | 1603 (45.9)           |
| 2                                          | 3275 (12.4)              | 2862 (12.7)          | 413 (11.9)            |

**Abbreviations:** *APOL1*, apolipoprotein L1; ATRH, apparent treatment resistant hypertension; NRH, non-resistant hypertension.

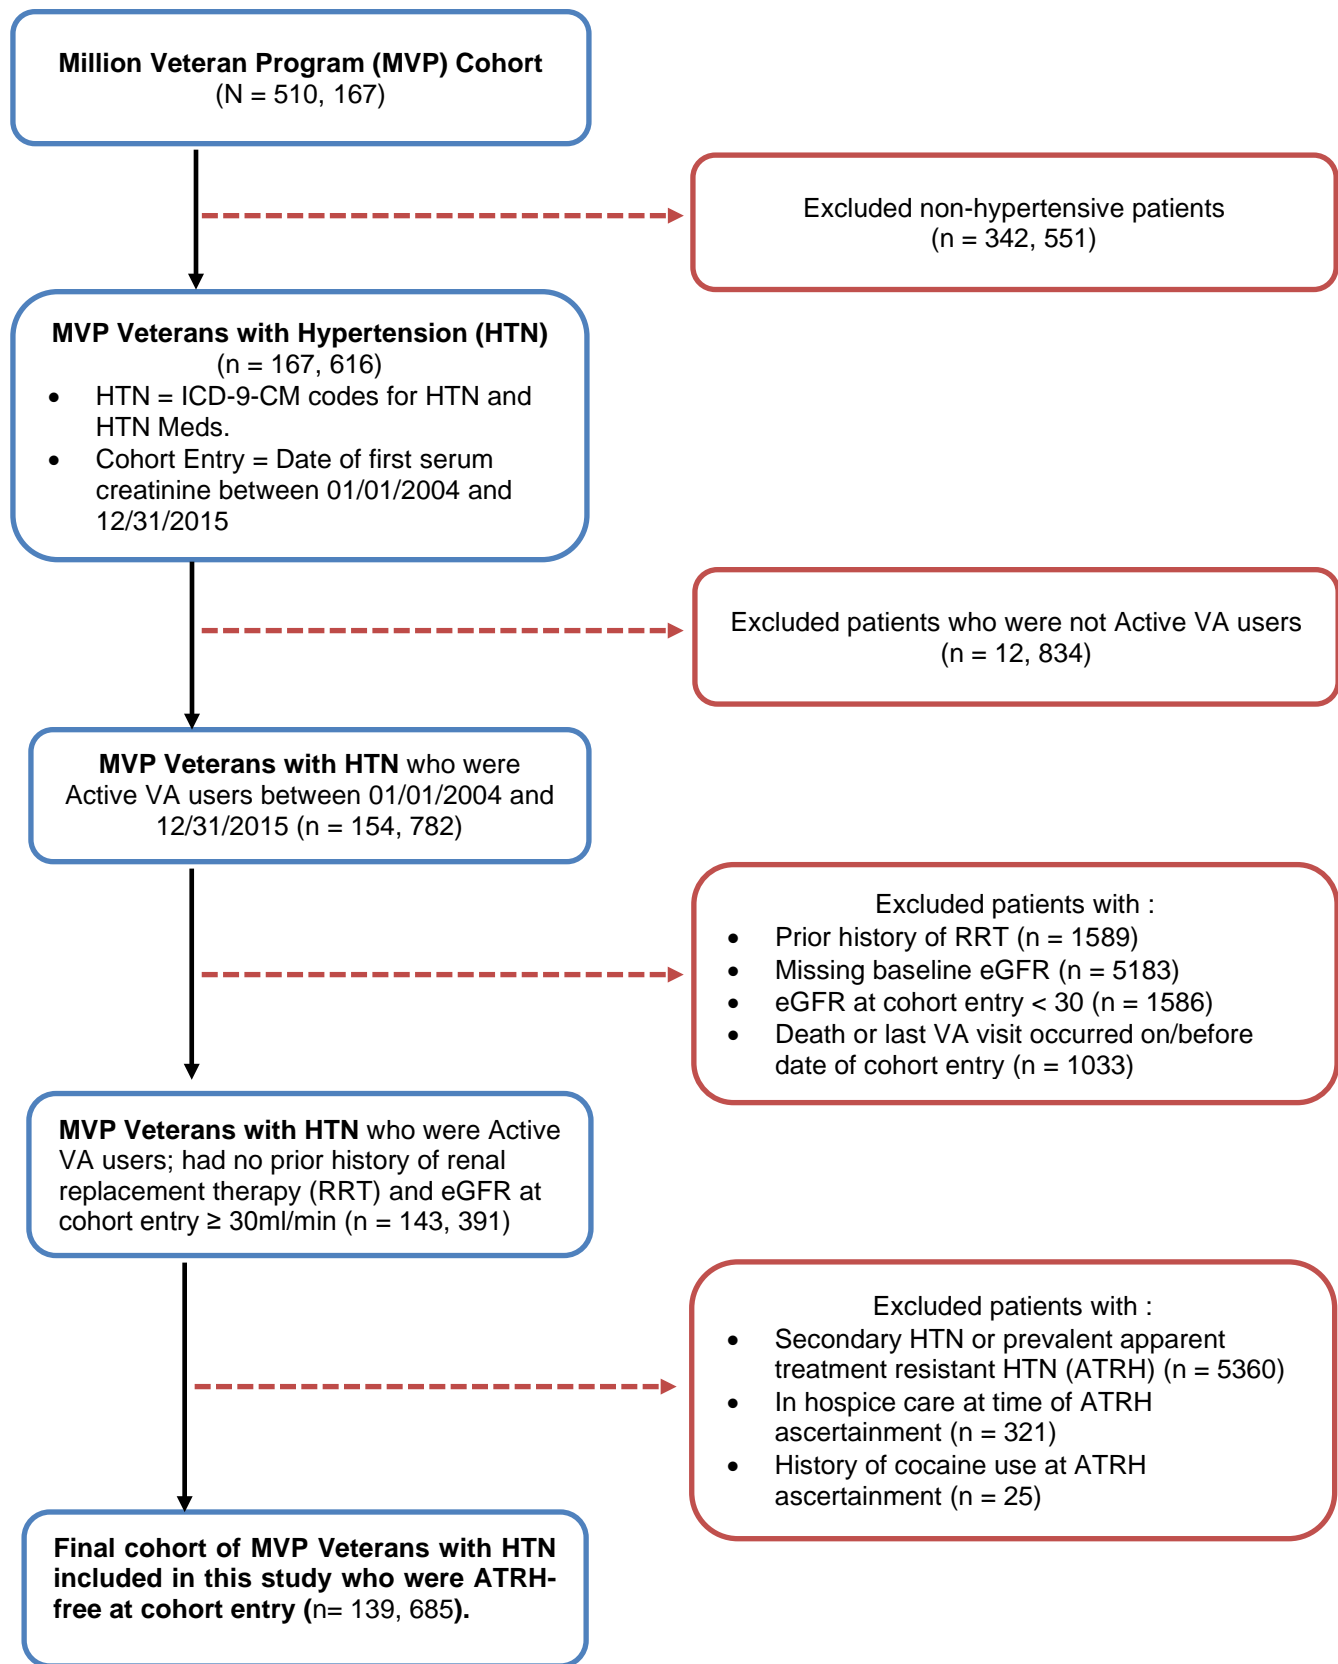

**Figure S1: Flow chart for retrospective cohort study of 139,685 hypertensive veterans enrolled in the Million Veteran Program who were active VHA users between 01/01/2004 and 12/31/2015.**

**Abbreviations:** ATRH, apparent treatment resistant hypertension; eGFR, estimated glomerular filtration rate; RRT, renal replacement therapy; VHA, Veterans Health Administration.

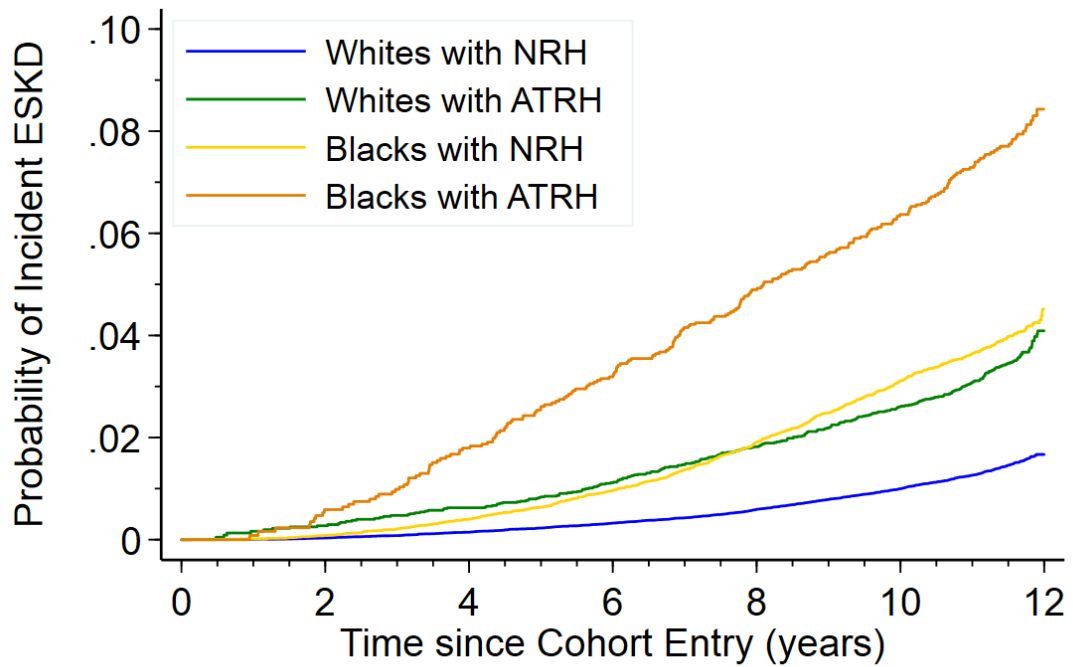

| Number at risk |       |       |       |       |   |
|----------------|-------|-------|-------|-------|---|
| Whites, NRH    | 98580 | 86854 | 75503 | 63021 | 0 |
| Whites, ATRH   | 0     | 5560  | 7698  | 8143  | 0 |
| Blacks, NRH    | 30950 | 26575 | 22521 | 18111 | 0 |
| Blacks, ATRH   | 0     | 2155  | 2941  | 3096  | 0 |

**Figure S2. Probability of incident ESKD in patients with ATRH and NRH by race**

**Abbreviations:** ATRH, apparent treatment resistant hypertension; ESKD, end-stage kidney disease; NRH; Non-resistant hypertension.

IRR (95%CI) P

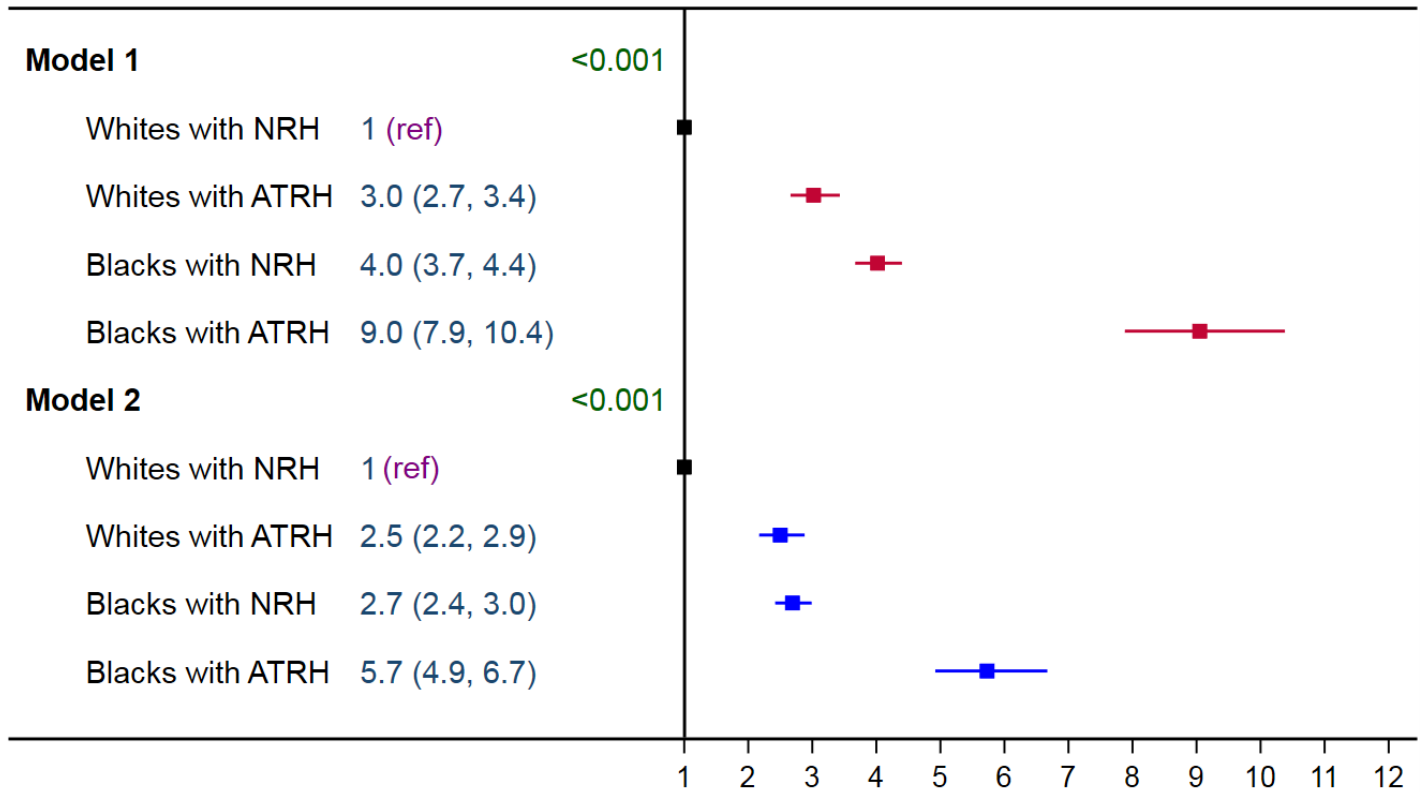

IRR: Incidence rate ratio for ESKD. P: p-values for additive interaction from Poisson regression  
 Model 1: Adjusted for eGFR. Model 2: Full adjustment for baseline covariates

|         | RERI (95% CI)    | AP (85%CI)       | S (95% CI)       | P       |
|---------|------------------|------------------|------------------|---------|
| Model 1 | 3.00 (1.79-4.21) | 33.2 (23.6-42.7) | 1.60 (1.33-1.86) | <0.001  |
| Model 2 | 1.59 (0.76-2.42) | 28.5 (17.0-40.0) | 1.53 (1.22-1.84) | < 0.001 |

**Model 1** is adjusted for eGFR. **Model 2** covariates included demographics (age, sex and race), smoking, body mass index, baseline eGFR, serum lipids (total cholesterol, triglycerides, LDL cholesterol and HDL cholesterol;) + Statin use + history of Cancer, COPD, diabetes, CAD, PAD and stroke. **RERI** =  $IRR_{11} - IRR_{10} - IRR_{01} + 1$ . **AP** =  $RERI / IRR_{11}$ . **S** =  $IRR_{11} - 1 / (IRR_{10} - 1) + (IRR_{01} - 1)$

**Figure S3. Adjusted Incidence rate ratios for ESKD and indices of interaction**

**Abbreviations:** AP, attributable proportion due to interaction; ATRH, apparent treatment resistant hypertension; BMI, body mass index; CAD, coronary artery disease; COPD, chronic obstructive pulmonary disease, eGFR, estimated glomerular filtration rate; ESKD, end-stage kidney disease; HTN, hypertension; NRH; Non-resistant hypertension; RERI, relative excess risk due to interaction; S, synergy index.

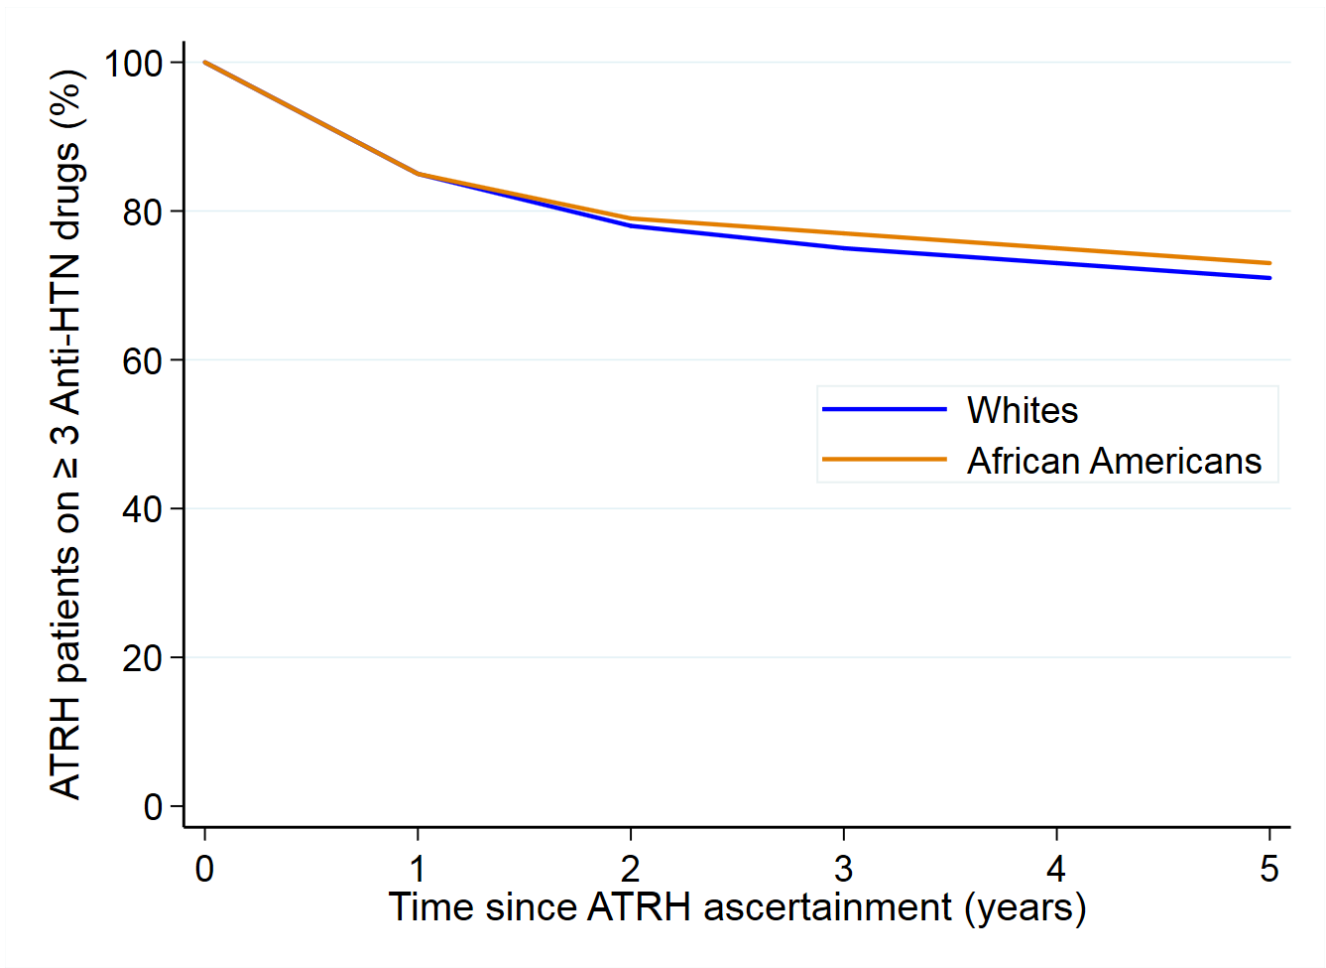

**Figure S4: Proportion of patients with ATRH taking 3 or more antihypertensive drugs during the 5 years following ATRH ascertainment**

**Abbreviations:** ATRH, apparent treatment resistant hypertension; HTN, hypertension.

## Appendix: VA Million Veteran Program

### MVP Executive Committee

- Co-Chair: J. Michael Gaziano, M.D., M.P.H.  
VA Boston Healthcare System, 150 S. Huntington Avenue, Boston, MA 02130
- Co-Chair: Sumitra Muralidhar, Ph.D.  
US Department of Veterans Affairs, 810 Vermont Avenue NW, Washington, DC 20420
- Rachel Ramoni, D.M.D., Sc.D., Chief VA Research and Development Officer  
US Department of Veterans Affairs, 810 Vermont Avenue NW, Washington, DC 20420
- Jean Beckham, Ph.D.  
Durham VA Medical Center, 508 Fulton Street, Durham, NC 27705
- Kyong-Mi Chang, M.D.  
Philadelphia VA Medical Center, 3900 Woodland Avenue, Philadelphia, PA 19104
- Christopher J. O'Donnell, M.D., M.P.H.  
VA Boston Healthcare System, 150 S. Huntington Avenue, Boston, MA 02130
- Philip S. Tsao, Ph.D.  
VA Palo Alto Health Care System, 3801 Miranda Avenue, Palo Alto, CA 94304
- James Breeling, M.D., Ex-Officio  
US Department of Veterans Affairs, 810 Vermont Avenue NW, Washington, DC 20420
- Grant Huang, Ph.D., Ex-Officio  
US Department of Veterans Affairs, 810 Vermont Avenue NW, Washington, DC 20420
- Juan P. Casas, M.D., Ph.D., Ex-Officio  
VA Boston Healthcare System, 150 S. Huntington Avenue, Boston, MA 02130

### MVP Program Office

- Sumitra Muralidhar, Ph.D.  
US Department of Veterans Affairs, 810 Vermont Avenue NW, Washington, DC 20420
- Jennifer Moser, Ph.D.  
US Department of Veterans Affairs, 810 Vermont Avenue NW, Washington, DC 20420

### MVP Recruitment/Enrollment

- Recruitment/Enrollment Director/Deputy Director, Boston – Stacey B. Whitbourne, Ph.D.; Jessica V. Brewer, M.P.H.  
VA Boston Healthcare System, 150 S. Huntington Avenue, Boston, MA 02130
- MVP Coordinating Centers
  - o Clinical Epidemiology Research Center (CERC), West Haven – Mihaela Aslan, Ph.D.  
West Haven VA Medical Center, 950 Campbell Avenue, West Haven, CT 06516
  - o Cooperative Studies Program Clinical Research Pharmacy Coordinating Center, Albuquerque – Todd Connor, Pharm.D.; Dean P. Argyres, B.S., M.S.  
New Mexico VA Health Care System, 1501 San Pedro Drive SE, Albuquerque, NM 87108
  - o Genomics Coordinating Center, Palo Alto – Philip S. Tsao, Ph.D.  
VA Palo Alto Health Care System, 3801 Miranda Avenue, Palo Alto, CA 94304
  - o MVP Boston Coordinating Center, Boston - J. Michael Gaziano, M.D., M.P.H.  
VA Boston Healthcare System, 150 S. Huntington Avenue, Boston, MA 02130

- MVP Information Center, Canandaigua – Brady Stephens, M.S.  
Canandaigua VA Medical Center, 400 Fort Hill Avenue, Canandaigua, NY 14424
- VA Central Biorepository, Boston – Mary T. Brophy M.D., M.P.H.; Donald E. Humphries, Ph.D.; Luis E. Selva, Ph.D.  
VA Boston Healthcare System, 150 S. Huntington Avenue, Boston, MA 02130
- MVP Informatics, Boston – Nhan Do, M.D.; Shahpoor (Alex) Shayan, M.S.  
VA Boston Healthcare System, 150 S. Huntington Avenue, Boston, MA 02130
- MVP Data Operations/Analytics, Boston – Kelly Cho, M.P.H., Ph.D.  
VA Boston Healthcare System, 150 S. Huntington Avenue, Boston, MA 02130
- Director of Regulatory Affairs – Lori Churby, B.S.  
VA Palo Alto Health Care System, 3801 Miranda Avenue, Palo Alto, CA 94304

## **MVP Science**

- Science Operations – Christopher J. O'Donnell, M.D., M.P.H.  
VA Boston Healthcare System, 150 S. Huntington Avenue, Boston, MA 02130
- Genomics Core – Christopher J. O'Donnell, M.D., M.P.H.; Saiju Pyarajan Ph.D.  
VA Boston Healthcare System, 150 S. Huntington Avenue, Boston, MA 02130  
Philip S. Tsao, Ph.D.  
VA Palo Alto Health Care System, 3801 Miranda Avenue, Palo Alto, CA 94304
- Data Core – Kelly Cho, M.P.H., Ph.D.  
VA Boston Healthcare System, 150 S. Huntington Avenue, Boston, MA 02130
- VA Informatics and Computing Infrastructure (VINCI) – Scott L. DuVall, Ph.D.  
VA Salt Lake City Health Care System, 500 Foothill Drive, Salt Lake City, UT 84148
- Data and Computational Sciences – Saiju Pyarajan, Ph.D.  
VA Boston Healthcare System, 150 S. Huntington Avenue, Boston, MA 02130
- Statistical Genetics – Elizabeth Hauser, Ph.D.  
Durham VA Medical Center, 508 Fulton Street, Durham, NC 27705  
Yan Sun, Ph.D.  
Atlanta VA Medical Center, 1670 Clairmont Road, Decatur, GA 30033  
Hongyu Zhao, Ph.D.  
West Haven VA Medical Center, 950 Campbell Avenue, West Haven, CT 06516

## **Current MVP Local Site Investigators**

- Atlanta VA Medical Center (Peter Wilson, M.D.)  
1670 Clairmont Road, Decatur, GA 30033
- Bay Pines VA Healthcare System (Rachel McArdle, Ph.D.)  
10,000 Bay Pines Blvd Bay Pines, FL 33744
- Birmingham VA Medical Center (Louis Dellitalia, M.D.)  
700 S. 19th Street, Birmingham AL 35233
- Central Western Massachusetts Healthcare System (Kristin Mattocks, Ph.D., M.P.H.)  
421 North Main Street, Leeds, MA 01053
- Cincinnati VA Medical Center (John Harley, M.D., Ph.D.)  
3200 Vine Street, Cincinnati, OH 45220
- Clement J. Zablocki VA Medical Center (Jeffrey Whittle, M.D., M.P.H.)  
5000 West National Avenue, Milwaukee, WI 53295
- VA Northeast Ohio Healthcare System (Frank Jacono, M.D.)



- 10701 East Boulevard, Cleveland, OH 44106
- Durham VA Medical Center (Jean Beckham, Ph.D.)  
508 Fulton Street, Durham, NC 27705
- Edith Nourse Rogers Memorial Veterans Hospital (John Wells., Ph.D.)  
200 Springs Road, Bedford, MA 01730
- Edward Hines, Jr. VA Medical Center (Salvador Gutierrez, M.D.)  
5000 South 5th Avenue, Hines, IL 60141
- Veterans Health Care System of the Ozarks (Gretchen Gibson, D.D.S., M.P.H.)  
1100 North College Avenue, Fayetteville, AR 72703
- Fargo VA Health Care System (Kimberly Hammer, Ph.D.)  
2101 N. Elm, Fargo, ND 58102
- VA Health Care Upstate New York (Laurence Kaminsky, Ph.D.)  
113 Holland Avenue, Albany, NY 12208
- New Mexico VA Health Care System (Gerardo Villareal, M.D.)  
1501 San Pedro Drive, S.E. Albuquerque, NM 87108
- VA Boston Healthcare System (Scott Kinlay, M.B.B.S., Ph.D.)  
150 S. Huntington Avenue, Boston, MA 02130
- VA Western New York Healthcare System (Junzhe Xu, M.D.)  
3495 Bailey Avenue, Buffalo, NY 14215-1199
- Ralph H. Johnson VA Medical Center (Mark Hamner, M.D.)  
109 Bee Street, Mental Health Research, Charleston, SC 29401
- Columbia VA Health Care System (Roy Mathew, M.D.)  
6439 Garners Ferry Road, Columbia, SC 29209
- VA North Texas Health Care System (Sujata Bhushan, M.D.)  
4500 S. Lancaster Road, Dallas, TX 75216
- Hampton VA Medical Center (Pran Iruvanti, D.O., Ph.D.)  
100 Emancipation Drive, Hampton, VA 23667
- Richmond VA Medical Center (Michael Godschalk, M.D.)  
1201 Broad Rock Blvd., Richmond, VA 23249
- Iowa City VA Health Care System (Zuhair Ballas, M.D.)  
601 Highway 6 West, Iowa City, IA 52246-2208
- Eastern Oklahoma VA Health Care System (Douglas Ivins, M.D.)  
1011 Honor Heights Drive, Muskogee, OK 74401
- James A. Haley Veterans' Hospital (Stephen Mastorides, M.D.)  
13000 Bruce B. Downs Blvd, Tampa, FL 33612
- James H. Quillen VA Medical Center (Jonathan Moorman, M.D., Ph.D.)  
Corner of Lamont & Veterans Way, Mountain Home, TN 37684
- John D. Dingell VA Medical Center (Saib Gappy, M.D.)  
4646 John R Street, Detroit, MI 48201
- Louisville VA Medical Center (Jon Klein, M.D., Ph.D.)  
800 Zorn Avenue, Louisville, KY 40206
- Manchester VA Medical Center (Nora Ratcliffe, M.D.)  
718 Smyth Road, Manchester, NH 03104
- Miami VA Health Care System (Hermes Florez, M.D., Ph.D.)  
1201 NW 16th Street, 11 GRC, Miami FL 33125
- Michael E. DeBakey VA Medical Center (Olaoluwa Okusaga, M.D.)  
2002 Holcombe Blvd, Houston, TX 77030

- Minneapolis VA Health Care System (Maureen Murdoch, M.D., M.P.H.)  
One Veterans Drive, Minneapolis, MN 55417
- N. FL/S. GA Veterans Health System (Peruvemba Sriram, M.D.)  
1601 SW Archer Road, Gainesville, FL 32608
- Northport VA Medical Center (Shing Shing Yeh, Ph.D., M.D.)  
79 Middleville Road, Northport, NY 11768
- Overton Brooks VA Medical Center (Neeraj Tandon, M.D.)  
510 East Stoner Ave, Shreveport, LA 71101
- Philadelphia VA Medical Center (Darshana Jhala, M.D.)  
3900 Woodland Avenue, Philadelphia, PA 19104
- Phoenix VA Health Care System (Samuel Aguayo, M.D.)  
650 E. Indian School Road, Phoenix, AZ 85012
- Portland VA Medical Center (David Cohen, M.D.)  
3710 SW U.S. Veterans Hospital Road, Portland, OR 97239
- Providence VA Medical Center (Satish Sharma, M.D.)  
830 Chalkstone Avenue, Providence, RI 02908
- Richard Roudebush VA Medical Center (Suthat Liangpunsakul, M.D., M.P.H.)  
1481 West 10th Street, Indianapolis, IN 46202
- Salem VA Medical Center (Kris Ann Oursler, M.D.)  
1970 Roanoke Blvd, Salem, VA 24153
- San Francisco VA Health Care System (Mary Whooley, M.D.)  
4150 Clement Street, San Francisco, CA 94121
- South Texas Veterans Health Care System (Sunil Ahuja, M.D.)  
7400 Merton Minter Boulevard, San Antonio, TX 78229
- Southeast Louisiana Veterans Health Care System (Joseph Constans, Ph.D.)  
2400 Canal Street, New Orleans, LA 70119
- Southern Arizona VA Health Care System (Paul Meyer, M.D., Ph.D.)  
3601 S 6th Avenue, Tucson, AZ 85723
- Sioux Falls VA Health Care System (Jennifer Greco, M.D.)  
2501 W 22nd Street, Sioux Falls, SD 57105
- St. Louis VA Health Care System (Michael Rauchman, M.D.)  
915 North Grand Blvd, St. Louis, MO 63106
- Syracuse VA Medical Center (Richard Servatius, Ph.D.)  
800 Irving Avenue, Syracuse, NY 13210
- VA Eastern Kansas Health Care System (Melinda Gaddy, Ph.D.)  
4101 S 4th Street Trafficway, Leavenworth, KS 66048
- VA Greater Los Angeles Health Care System (Agnes Wallbom, M.D., M.S.)  
11301 Wilshire Blvd, Los Angeles, CA 90073
- VA Long Beach Healthcare System (Timothy Morgan, M.D.)  
5901 East 7th Street Long Beach, CA 90822
- VA Maine Healthcare System (Todd Stapley, D.O.)  
1 VA Center, Augusta, ME 04330
- VA New York Harbor Healthcare System (Scott Sherman, M.D., M.P.H.)  
423 East 23rd Street, New York, NY 10010
- VA Pacific Islands Health Care System (George Ross, M.D.)  
459 Patterson Rd, Honolulu, HI 96819
- VA Palo Alto Health Care System (Philip Tsao, Ph.D.)

- 3801 Miranda Avenue, Palo Alto, CA 94304-1290
- VA Pittsburgh Health Care System (Patrick Strollo, Jr., M.D.)  
University Drive, Pittsburgh, PA 15240
  - VA Puget Sound Health Care System (Edward Boyko, M.D.)  
1660 S. Columbian Way, Seattle, WA 98108-1597
  - VA Salt Lake City Health Care System (Laurence Meyer, M.D., Ph.D.)  
500 Foothill Drive, Salt Lake City, UT 84148
  - VA San Diego Healthcare System (Samir Gupta, M.D., M.S.C.S.)  
3350 La Jolla Village Drive, San Diego, CA 92161
  - VA Sierra Nevada Health Care System (Mostaqul Huq, Pharm.D., Ph.D.)  
975 Kirman Avenue, Reno, NV 89502
  - VA Southern Nevada Healthcare System (Joseph Fayad, M.D.)  
6900 North Pecos Road, North Las Vegas, NV 89086
  - VA Tennessee Valley Healthcare System (Adriana Hung, M.D., M.P.H.)  
1310 24th Avenue, South Nashville, TN 37212
  - Washington DC VA Medical Center (Jack Lichy, M.D., Ph.D.)  
50 Irving St, Washington, D. C. 20422
  - W.G. (Bill) Hefner VA Medical Center (Robin Hurley, M.D.)  
1601 Brenner Ave, Salisbury, NC 28144
  - White River Junction VA Medical Center (Brooks Robey, M.D.)  
163 Veterans Drive, White River Junction, VT 05009
  - William S. Middleton Memorial Veterans Hospital (Robert Striker, M.D., Ph.D.)  
2500 Overlook Terrace, Madison, WI 53705
